# Supplementary material
Source: publisher figshare collection journal article supplement (https://karger.figshare.com/articles/dataset/_/11961321)

**A**

Development cohort

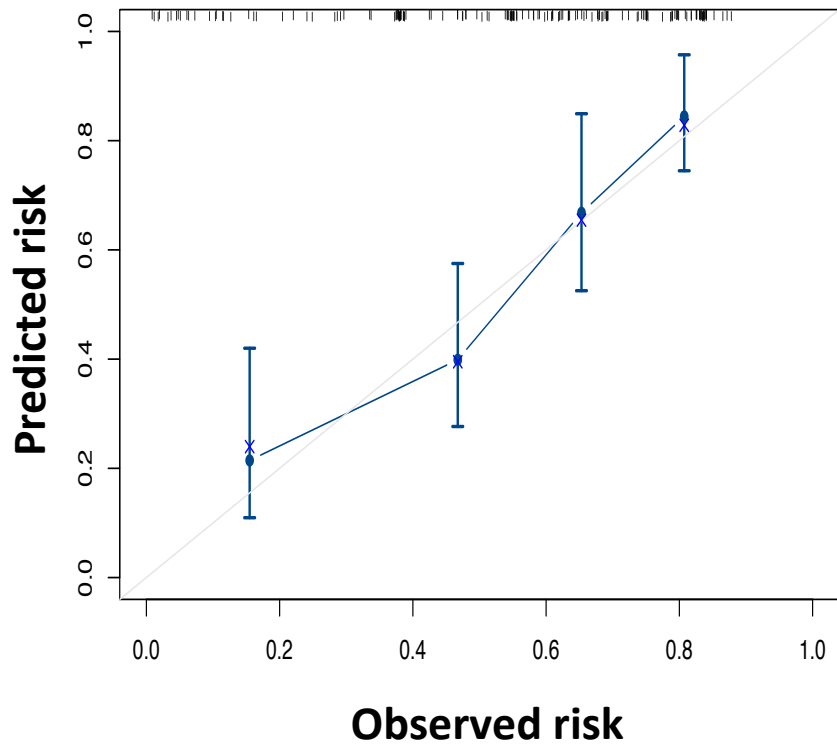**B**

Validation cohort

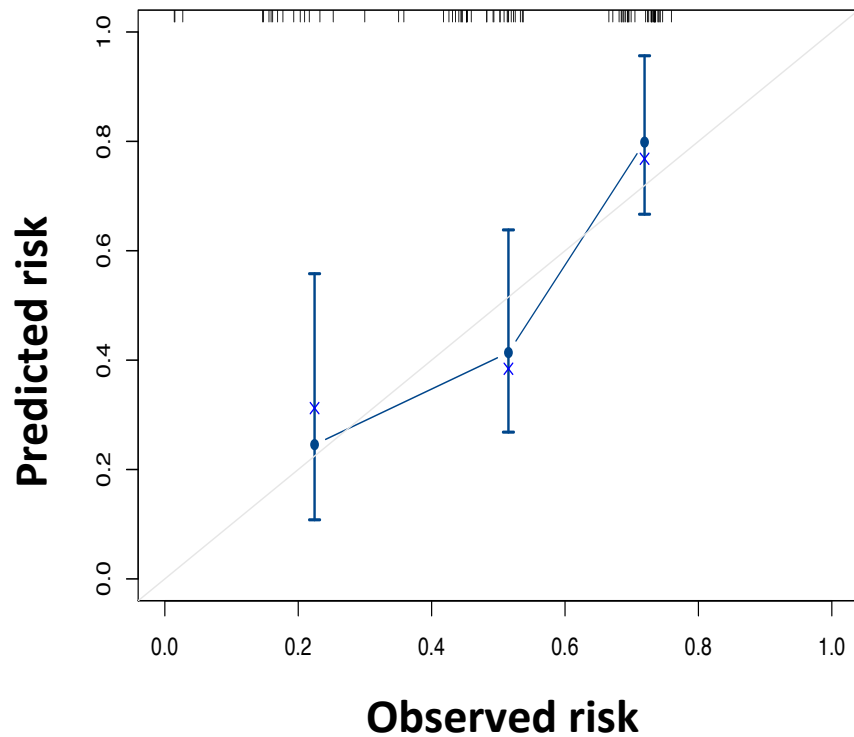

Supplement: Supplementary file 1 [file 1]
